# Supplementary material for: One pot-synthesis of chiral Ni6 clusters involving Ni3 subunits: a combined structural, magnetic and DFT study
Source: Royal Society of Chemistry journal article supplement (doi:10.1039/c0dt00659a), 2010-01-01
Supplement: c0dt00659a.pdf [file c0dt00659a.pdf]

## Electronic Supplementary Information

### One pot-synthesis of chiral $\text{Ni}_6$ clusters involving $\text{Ni}_3$ subunits: a combined structural, magnetic and DFT study

*Matilde Fondo, Noelia Ocampo, Ana M. García-Deibe, Joan Cano, Jesús Sanmartín*

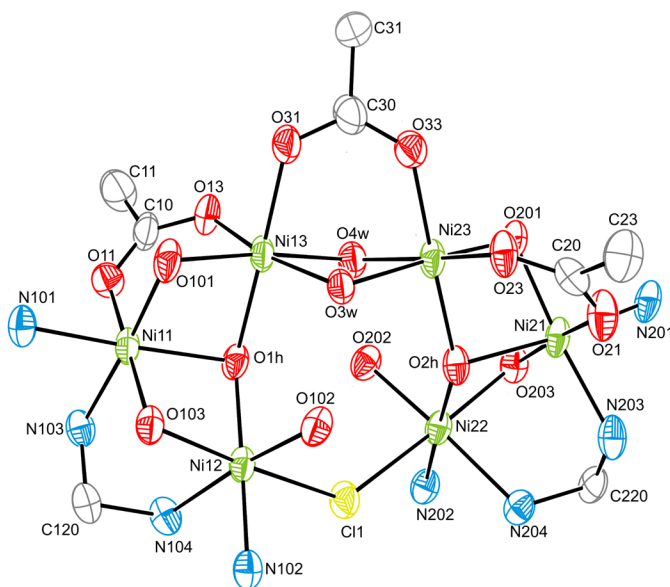

**Fig. S1.** An ORTEP view of the core of **2**. Ellipsoids are drawn at 40% probability

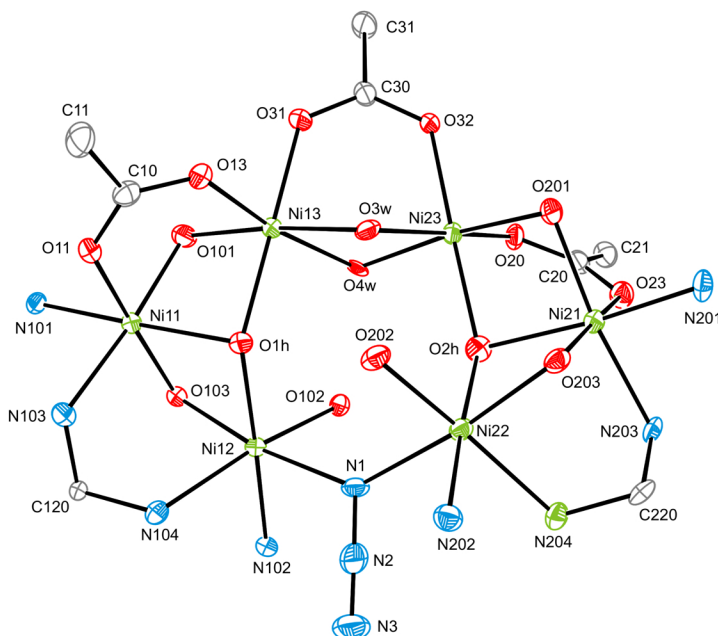

**Fig. S2.** An ORTEP view of the core of **3**. Ellipsoids are drawn at 40% probability

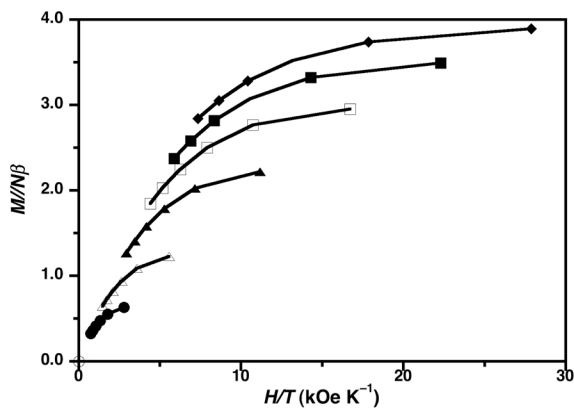

**Fig. S3.** Magnetic field dependence of  $M$  at 1.8-6.8 K, for  $2 \cdot 2\text{H}_2\text{O}$  in the form  $M$  vs  $H/T$ . Data at 0 kOe (circles), 0.5 kOe (black circles), 1 kOe (triangles), 2 kOe (black triangles), 3 kOe (squares), 4 kOe (black squares) and 5 kOe (black diamonds) are shown.

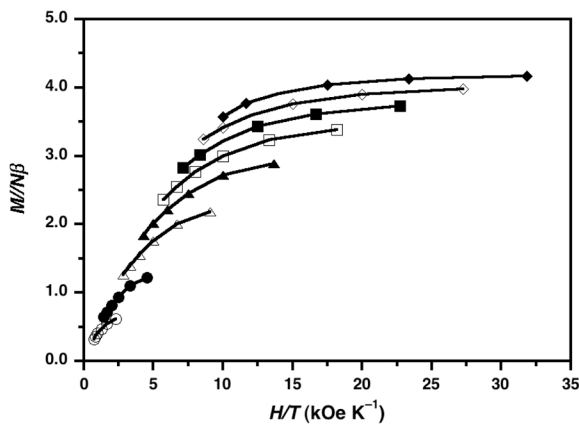

**Fig. S4.** Magnetic field dependence of  $M$  at 2.2-7.0 K, for  $3 \cdot 6\text{H}_2\text{O}$  in the form  $M$  vs  $H/T$ . Data at 0.5 kOe, (circles), 1 kOe (black circles), 2 kOe (triangles), 3 kOe (black triangles), 4 kOe (squares), 5 kOe (black squares), 6 kOe (diamonds) and 7 kOe (black diamonds) are shown.
